# Supplementary material for: Detection of Theileria orientalis Genotypes from Cattle in Kyrgyzstan
Source: MDPI journal article supplement (doi:10.3390/pathogens11101185), 2022-10-14
Supplement: s1 [file s1]

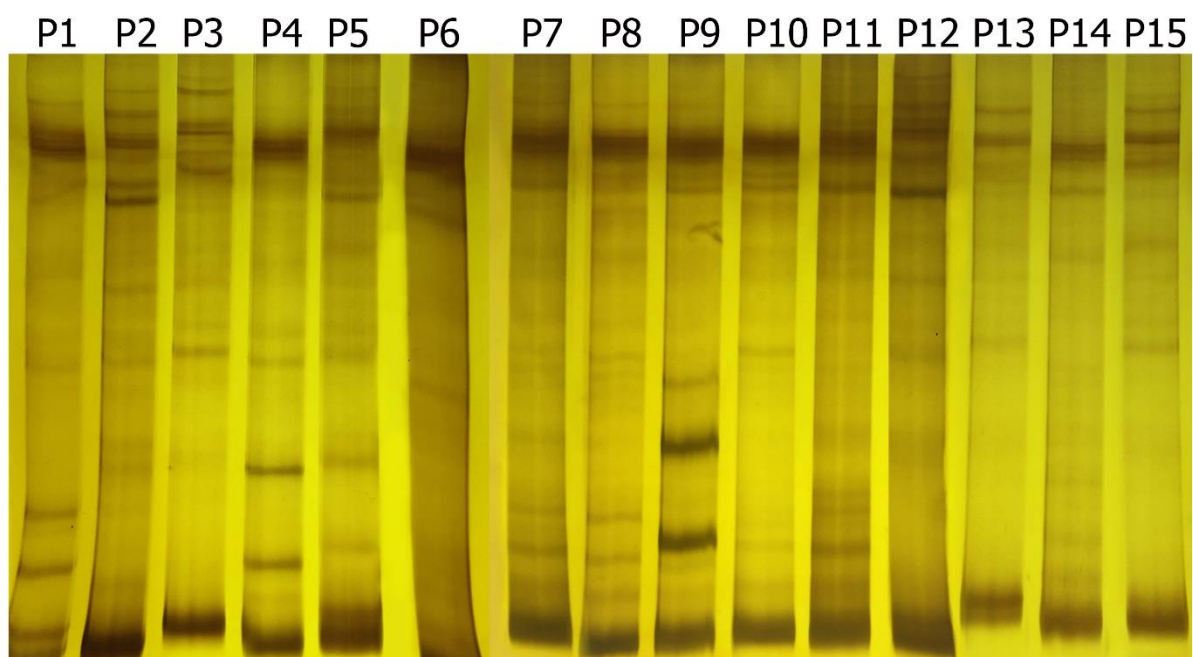

**Supplementary Figure S1:** Representative single-stranded conformation polymorphism gel showing 15 different profiles (P1–P15).
